# Supplementary material for: Chaotic Homes and Children’s Disruptive Behavior: A Longitudinal Cross-Lagged Twin Study
Source: PubMed Central journal article supplement (PMC3494454; doi:10.1177/0956797611431693), 2012-06
Supplement: DS_10.1177_0956797611431693.pdf [file DS_10.1177_0956797611431693.pdf]

**Table 1s.** Cholesky decomposition of the cross-lagged relationship between **parent-rated conduct and child-rated CHAOS** (standardized un-squared path estimates)

| <i>Variance Component</i> | <i>9-year</i>  |                | <i>12-year</i> |                |
|---------------------------|----------------|----------------|----------------|----------------|
|                           | <b>CHAOS</b>   | <b>conduct</b> | <b>conduct</b> | <b>CHAOS</b>   |
| <b>A<sub>1</sub></b>      | .49 (.39-.56)  | .14 (.03-.25)  | .07 (.00-.18)  | .13 (.00-.25)  |
| <b>C<sub>1</sub></b>      | .65 (.59-.70)  | .31 (.24-.39)  | .30 (.22-.38)  | .59 (.51-.67)  |
| <b>E<sub>1</sub></b>      | .58 (.56-.61)  | .00 (.00-.03)  | .00 (.00-.02)  | .02 (.00-.06)  |
| <b>A<sub>2</sub></b>      |                | .71 (.66-.76)  | .54 (.47-.59)  | .00 (.00-.06)  |
| <b>C<sub>2</sub></b>      |                | .41 (.32-.49)  | .05 (.00-.17)  | .10 (.00-.20)  |
| <b>E<sub>2</sub></b>      |                | .45 (.43-.47)  | .17 (.14-.20)  | .00 (.00-.02)  |
| <b>A<sub>3</sub></b>      |                |                | .46 (.38-.52)  | .03 (.00-.11)  |
| <b>C<sub>3</sub></b>      |                |                | .43 (.34-.48)  | .13 (.00-.24)  |
| <b>E<sub>3</sub></b>      |                |                | .44 (.42-.46)  | .01 (.00-.03)  |
| <b>A<sub>4</sub></b>      |                |                |                | .34 (.22-.43)  |
| <b>C<sub>4</sub></b>      |                |                |                | .37 (.19-.47)  |
| <b>E<sub>4</sub></b>      |                |                |                | .60 (.58-.62)  |
|                           | <b>conduct</b> | <b>CHAOS</b>   | <b>CHAOS</b>   | <b>conduct</b> |
| <b>A<sub>1</sub></b>      | .73 (.68-.78)  | .09 (.03-.16)  | .02 (.00-.08)  | .54 (.47-.60)  |
| <b>C<sub>1</sub></b>      | .52 (.45-.58)  | .39 (.30-.50)  | .45 (.35-.55)  | .22 (.13-.31)  |
| <b>E<sub>1</sub></b>      | .45 (.43-.47)  | .00 (.00-.04)  | .00 (.00-.02)  | .17 (.14-.20)  |
| <b>A<sub>2</sub></b>      |                | .48 (.38-.56)  | .13 (.00-.27)  | .00 (.00-.07)  |
| <b>C<sub>2</sub></b>      |                | .52 (.40-.60)  | .39 (.24-.52)  | .19 (.11-.31)  |
| <b>E<sub>2</sub></b>      |                | .58 (.56-.61)  | .02 (.00-.06)  | .00 (.00-.01)  |
| <b>A<sub>3</sub></b>      |                |                | .34 (.21-.43)  | .04 (.00-.17)  |
| <b>C<sub>3</sub></b>      |                |                | .39 (.22-.49)  | .17 (.04-.32)  |
| <b>E<sub>3</sub></b>      |                |                | .60 (.58-.62)  | .01 (.00-.02)  |
| <b>A<sub>4</sub></b>      |                |                |                | .46 (.38-.52)  |
| <b>C<sub>4</sub></b>      |                |                |                | .41 (.31-.46)  |
| <b>E<sub>4</sub></b>      |                |                |                | .44 (.42-.46)  |

In each row are the standardized (unsquared) path coefficients (and 95% confidence interval) leading from the latent variance component in column 1 to the measured trait labeled at the top of each column. Variance components with subscript 1 explain variance in measured trait 1 (column 2); subscripts 2, 3, and 4 denote variance components explaining residual variation in measured traits 2, 3, and 4 (columns 3, 4, and 5). A, C, and E = genetic, shared, and nonshared environmental variance components; CHAOS = CHAOS; conduct = conduct problems.

**Table 2s.** Cholesky decomposition of the cross-lagged relationship between **parent-rated hyperactivity and child-rated CHAOS** (standardized un-squared estimates)

| <i>Component</i>     | <i>9-year</i>        |                      | <i>12-year</i>       |                      |
|----------------------|----------------------|----------------------|----------------------|----------------------|
|                      | <b>CHAOS</b>         | <b>hyperactivity</b> | <b>hyperactivity</b> | <b>CHAOS</b>         |
| <b>A<sub>1</sub></b> | .47 (.38-.56)        | .20 (.12-.29)        | .23 (.14-.34)        | .12 (.00-.25)        |
| <b>C<sub>1</sub></b> | .66 (.60-.71)        | .21 (.16-.26)        | .19 (.13-.24)        | .58 (.50-.67)        |
| <b>E<sub>1</sub></b> | .59 (.56-.61)        | .00 (.00-.01)        | .01 (.00-.04)        | .02 (.00-.06)        |
| <b>A<sub>2</sub></b> |                      | .79 (.76-.81)        | .53 (.49-.57)        | .05 (.00-.10)        |
| <b>C<sub>2</sub></b> |                      | .02 (.00-.11)        | .13 (.00-.20)        | .41 (.00-.51)        |
| <b>E<sub>2</sub></b> |                      | .54 (.51-.57)        | .27 (.24-.30)        | .00 (.00-.01)        |
| <b>A<sub>3</sub></b> |                      |                      | .60 (.56-.63)        | .02 (.00-.09)        |
| <b>C<sub>3</sub></b> |                      |                      | .00 (.00-.19)        | .00 (.00-.50)        |
| <b>E<sub>3</sub></b> |                      |                      | .41 (.40-.43)        | .03 (.00-.06)        |
| <b>A<sub>4</sub></b> |                      |                      |                      | .33 (.21-.42)        |
| <b>C<sub>4</sub></b> |                      |                      |                      | .00 (.00-.26)        |
| <b>E<sub>4</sub></b> |                      |                      |                      | .60 (.58-.62)        |
|                      | <b>hyperactivity</b> | <b>CHAOS</b>         | <b>CHAOS</b>         | <b>hyperactivity</b> |
| <b>A<sub>1</sub></b> | .82 (.79-.84)        | .12 (.07-.16)        | .09 (.04-.13)        | .58 (.54-.61)        |
| <b>C<sub>1</sub></b> | .22 (.17-.26)        | .65 (.57-.70)        | .59 (.46-.68)        | .19 (.13-.24)        |

|                      |               |               |               |               |
|----------------------|---------------|---------------|---------------|---------------|
| <b>E<sub>1</sub></b> | .54 (.51-.57) | .00 (.00-.01) | .00 (.00-.01) | .27 (.24-.30) |
| <b>A<sub>2</sub></b> |               | .46 (.37-.54) | .10 (.00-.21) | .09 (.00-.19) |
| <b>C<sub>2</sub></b> |               | .00 (.00-.32) | .05 (.00-.55) | .02 (.00-.20) |
| <b>E<sub>2</sub></b> |               | .59 (.56-.61) | .02 (.00-.06) | .01 (.00-.04) |
| <b>A<sub>3</sub></b> |               |               | .34 (.22-.42) | .04 (.00-.15) |
| <b>C<sub>3</sub></b> |               |               | .40 (.21-.50) | .13 (.00-.19) |
| <b>E<sub>3</sub></b> |               |               | .60 (.58-.62) | .02 (.00-.04) |
| <b>A<sub>4</sub></b> |               |               |               | .60 (.56-.63) |
| <b>C<sub>4</sub></b> |               |               |               | .00 (.00-.09) |
| <b>E<sub>4</sub></b> |               |               |               | .42 (.40-.43) |

---

See note to Table 1s; hyperactivity = hyperactivity/inattention.
